# Supplementary material for: Irritant Contact Dermatitis Risk of Common Topical Traditional Chinese Medicines Used for Skin‐Lightening: A Pilot Clinical Trial with 30 Volunteers
Source: Hindawi journal article supplement (doi:10.1155/2014/609064), 2014-01-01
Supplement: f1 [file 609064.f1.pdf]

**Irritant Contact Dermatitis Risk of Common Topical Traditional Chinese Medicines Used for Skin-lightening: A Pilot Clinical Trial with 30 Volunteers**

**Supplementary Data**

**Figures.** The quality control data of authenticated (appearance, microscopic characteristics and thin-layer chromatography) samples of the individual herbal constituents, complying with specifications given in the Chinese pharmacopoeia, were provided by Sheng Foong Pharmaceutical Co., Ltd (Proof certification according to ISO17025/TAF, Ilan County, Taiwan).

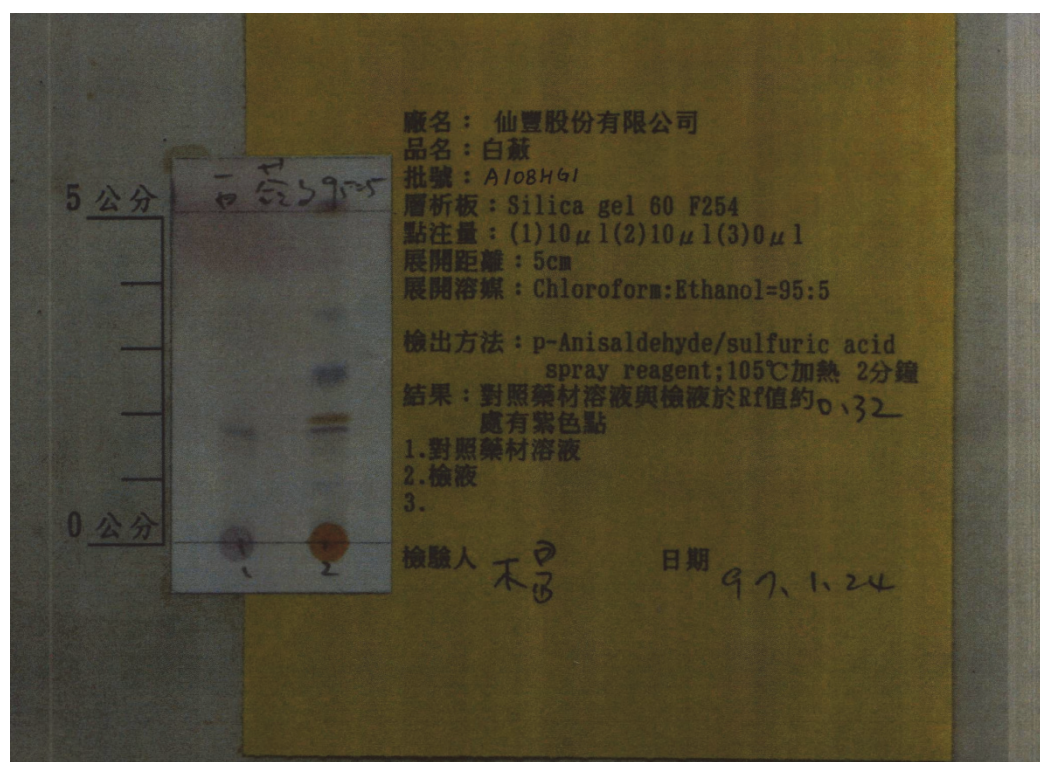

圖3.1 白薤藥材T.L.C.鑑別檢測

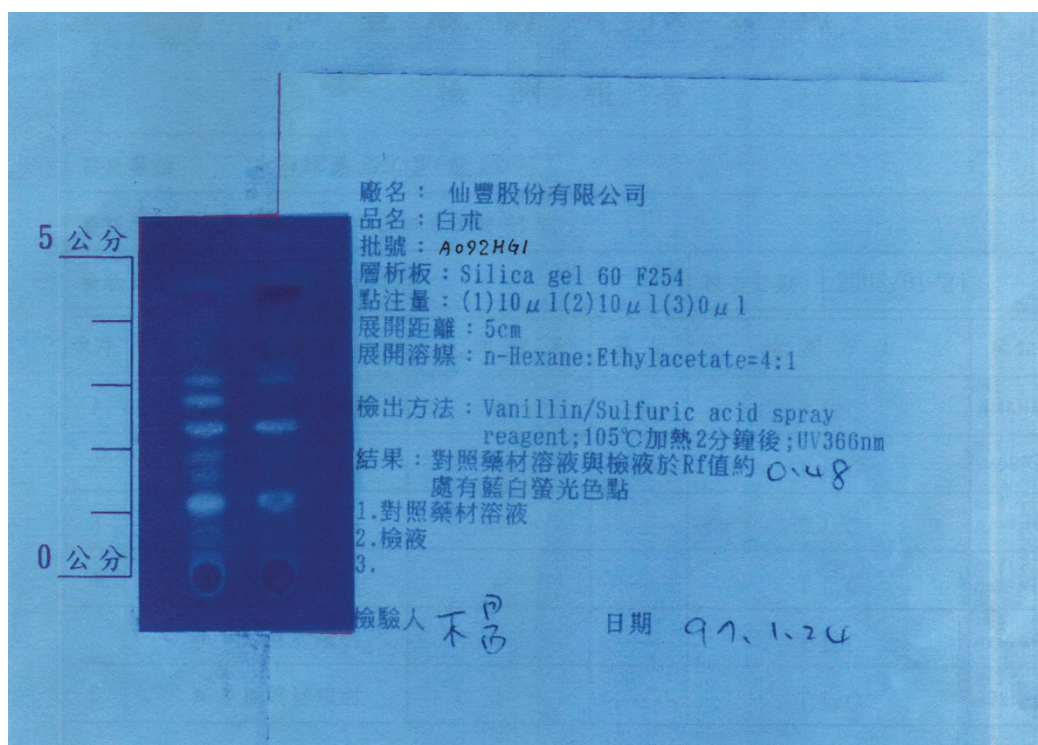

圖3.2 白朮藥材T.L.C.鑑別檢測

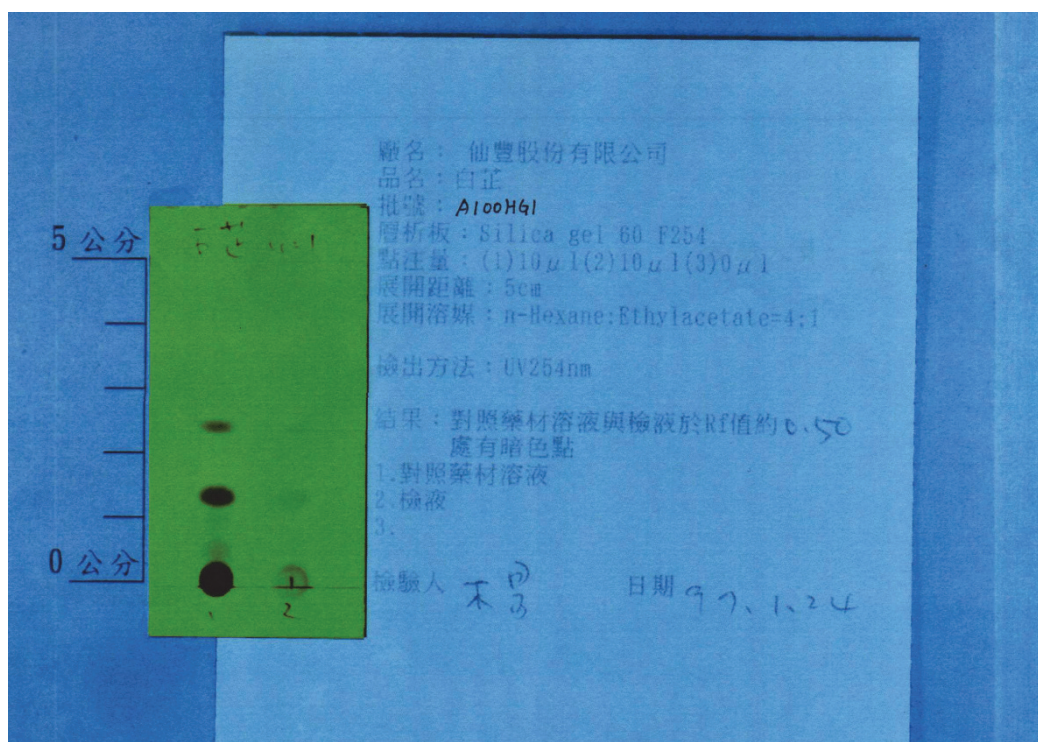

圖3.3 白芷藥材T.L.C.鑑別檢測



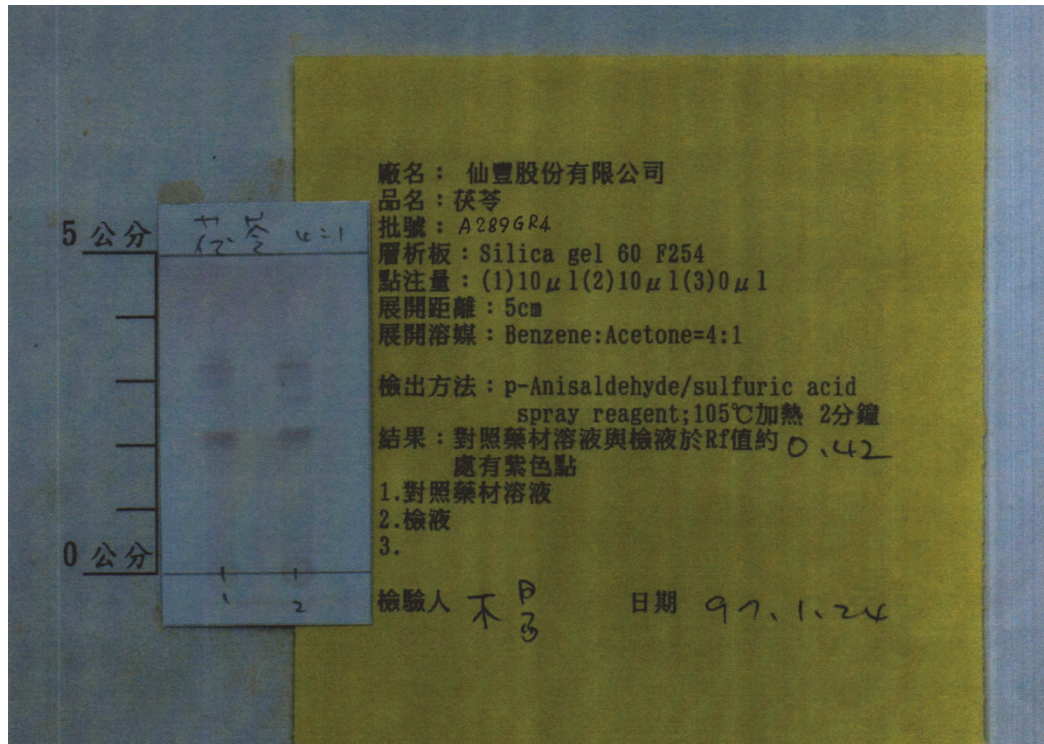

圖3.4 白茯苓藥材T.L.C.鑑別檢測

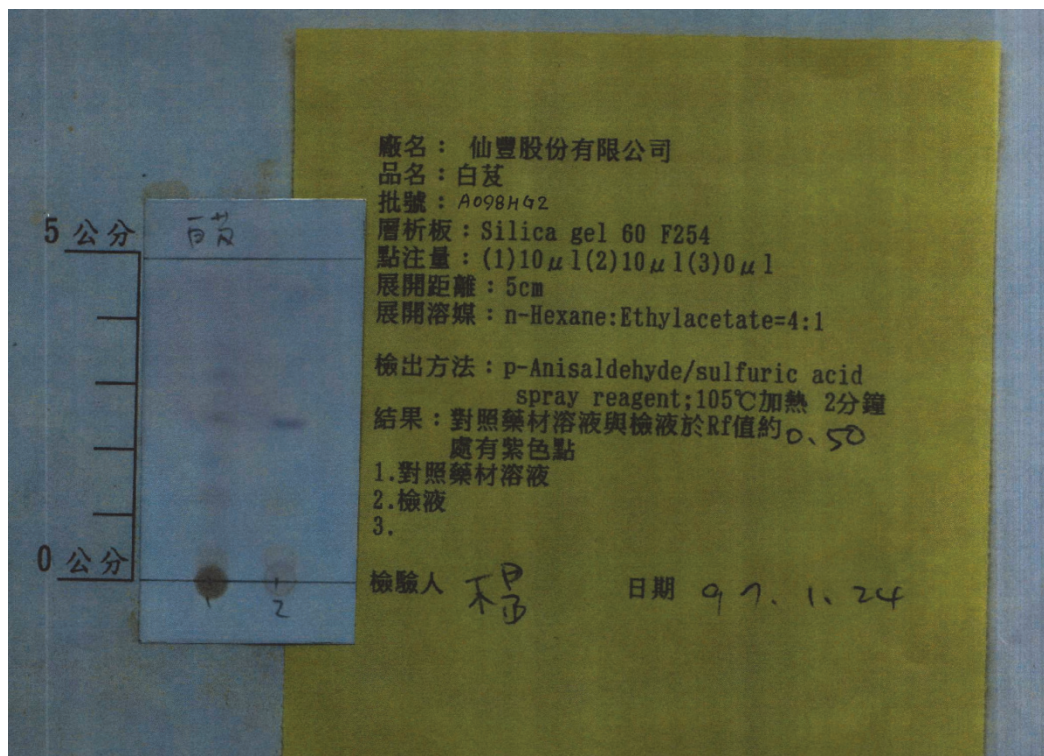

圖3.5 白芨藥材T.L.C.鑑別檢測

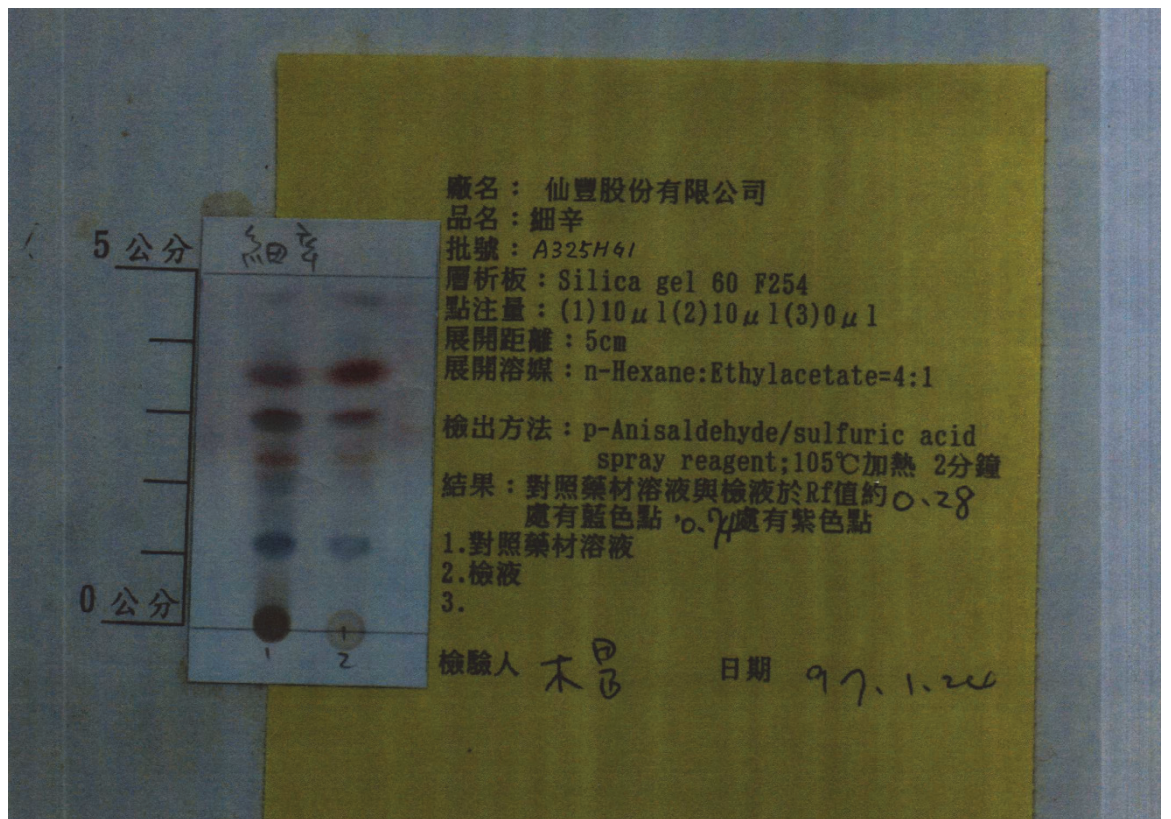

圖3.6 細辛藥材T.L.C.鑑別檢測



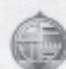

# 仙豐股份有限公司

## 檢測報告

| 委託單位   | 杏輝藥品工業(股)公司    |      |    |       |                 |
|--------|----------------|------|----|-------|-----------------|
| 委託單位地址 | 宜蘭縣冬山鄉中山村 84 號 |      |    |       |                 |
| 檢驗日期   | 2008/01/24     |      |    | 報告日期  | 2008/01/24      |
| 次序     | 檢驗項目           | 檢測結果 | 單位 | 檢測方法  | 備註              |
| 1      | 白薇片藥材鑑別        | +    | —— | T.L.C | 檢號:<br>A108/H61 |
| 2      | 白朮片藥材鑑別        | +    | —— | T.L.C | 檢號:<br>A092/H61 |
| 3      | 白芷片藥材鑑別        | +    | —— | T.L.C | 檢號:<br>A100/H61 |
| 4      | 白芨片藥材鑑別        | +    | —— | T.L.C | 檢號:<br>A098/H62 |
| 5      | 茯苓片藥材鑑別        | +    | —— | T.L.C | 檢號:<br>A289/G04 |
| 6      | 細辛根藥材鑑別        | +    | —— | T.L.C | 檢號:<br>A325/H61 |
| 以下空白~~ |                |      |    |       |                 |

實驗室主管:

潘賢隆

檢驗人員:

不是西
